# Supplementary material for: Regional centroid MT inversion of small to moderate earthquakes inthe Alps using the dense AlpArray seismic network: challenges andseismotectonic insights
Source: Copernicus journal article supplement (doi:10.5194/se-2021-13), 2021-02-16
Supplement: Supplementary file 1 [file se-2021-13-supplement.zip]

Archive with 3 entries (3 files):
- Petersen_AAMT_supplement.pdf
- Alps_2016-2019_CMT-best-solutions_Petersen.csv
- Alps_2016-2019_CMT-statistics-solutions_Petersen.csv
