# Supplementary material for: Regional centroid MT inversion of small to moderate earthquakes inthe Alps using the dense AlpArray seismic network: challenges andseismotectonic insights
Source: Copernicus journal article supplement (doi:10.5194/se-2021-13), 2021-02-16
Supplement: Supplementary file 1 [file se-2021-13-supplement.zip › Alps_2016-2019_CMT-best-solutions_Petersen.csv]

Supplementary table of MT solutions
Petersen et al. :
Regional centroid MT inversion of small to moderate earthquakes in the Alps using the dense AlpArray seismic network: challenges and seismotectonic insights
Do not hesitate to contact the corresponding author in case of questions: gesap@gfz-potsdam.de
date	time	lat	lon	depth	Mw	rmm	rmee	rmdd	rmne	rmnd	rmed	strike	dip	rake	strike	dip	rake
2016-01-31	22:44:00.030	47.0416	10.1602	8.7	3.53	0.091	0.675	-0.767	0.592	0.124	0.328	334.42	55.76	-81.97	140.33	35.06	-101.6
2016-03-14	13:36:14.225	44.3985	7.2284	8.5	3.743	0.272	-0.969	0.697	0.118	-0.301	0.382	205.64	61.69	114.61	341.64	36.83	52.29
2016-04-09	13:02:34.269	45.931	15.6003	2.8	3.665	-1.016	0.32	0.696	0.084	-0.311	-0.296	290.93	60.18	121.89	59.56	42.55	47.33
2016-05-28	03:31:43.776	44.9449	11.2552	5.6	3.302	-0.755	0.569	0.187	-0.55	0.234	-0.422	330.86	66.42	161.29	68.58	72.91	24.74
2016-06-23	14:37:58.425	44.2115	9.9842	8.3	3.98	0.754	-0.342	-0.412	0.672	0.261	-0.229	256.41	70.42	-150.09	155.5	61.98	-22.31
2016-06-24	04:12:19.362	46.2768	7.4093	6.5	3.141	-0.194	0.098	0.096	0.876	0.369	0.261	187.56	67.51	13.35	92.37	77.69	156.95
2016-07-04	11:37:25.940	44.9944	11.3096	6.1	3.645	-0.965	0.184	0.781	-0.125	-0.409	-0.172	285.47	58.62	101.08	84.86	33.09	72.51
2016-07-25	12:05:31.065	47.3253	11.1592	8.8	3.3	-0.799	0.002	0.797	0.092	-0.576	0.152	258.58	63.3	85.47	88.57	27.05	98.92
2016-07-30	20:21:39.596	44.967	7.1943	9.4	3.808	-0.393	0.898	-0.505	-0.279	-0.559	-0.036	46.46	62.04	-39.04	157.28	56.19	-145.65
2016-09-03	19:14:54.986	43.9214	7.5348	9.2	3.48	-0.272	1.052	0.359	0.392	-0.438	-0.004	121.39	79.89	-155.28	26.77	65.69	-11.11
2016-10-07	07:27:10.098	46.5433	9.593	8.6	3.581	0.884	-0.078	-0.806	0.308	-0.416	0.116	303.04	36.15	-63.3	91.13	58.19	-108.17
2016-10-24	14:44:14.229	46.3774	7.5829	13	3.691	0.031	-0.351	0.32	0.757	0.527	0.188	179.48	57.31	22.31	76.99	71.37	145.25
2016-10-25	16:53:04.693	43.6071	10.988	7.2	4.104	0.165	-0.267	0.102	0.897	-0.369	0.06	262.44	87.69	157.59	353.4	67.61	2.5
2016-10-30	10:49:47.689	44.1274	12.4265	19.2	3.71	-0.557	-0.034	0.592	-0.664	-0.247	0.409	271.59	56.24	39.62	156.89	57.98	139.05
2016-11-09	15:35:10.958	44.2171	6.0795	5.1	3.683	-0.824	0.867	-0.043	0.092	-0.524	-0.019	134.73	74.2	-158.06	38.47	68.93	-16.97
2016-11-10	02:48:15.952	44.2889	6.2124	5.4	3.762	-0.895	0.174	0.721	0.198	0.373	0.383	234.01	41.63	46.18	106.09	61.36	121.61
2016-12-03	09:01:43.017	46.9337	5.5438	6.5	3.296	-0.251	0.452	-0.201	0.621	-0.662	0.149	7.35	53.26	-17.69	108.15	75.91	-141.93
2016-12-09	07:21:54.453	44.321	10.4282	6.4	4.086	0.167	0.78	-0.947	0.436	-0.108	-0.181	333.36	38.94	-88.78	151.79	51.07	-90.99
2017-02-09	08:14:03.193	45.8611	11.3151	13.6	3.466	-0.306	-0.182	0.488	-0.498	-0.654	0.376	273.25	69.77	51.57	159.7	42.69	149.34
2017-03-06	20:12:09.158	46.9304	8.9197	2.8	4.145	0.46	-0.206	-0.254	0.876	0.224	0.152	79.07	82.33	171.89	170.16	81.97	7.75
2017-03-31	02:15:18.158	44.6225	9.5927	9.6	3.484	0.356	0.432	-0.788	0.606	0.37	-0.167	292.86	54.77	-122.67	160.88	46.56	-52.61
2017-05-12	07:44:13.298	47.299	11.3866	20.2	3.345	-0.788	0.532	0.256	0.61	-0.068	-0.372	290.3	68.27	162.03	27.14	73.35	22.73
2017-06-02	19:05:13.402	46.2629	7.2942	3.7	3.309	0.569	-0.261	-0.308	0.423	-0.02	-0.76	259.07	42.82	-160.05	154.16	76.59	-48.94
2017-06-04	18:00:59.565	45.7037	10.7174	4.8	3.492	-0.421	-0.36	0.781	0.402	0.603	0.128	207.58	36.38	50.29	73.47	62.85	115.21
2017-06-06	07:18:04.054	46.8145	7.3293	4.3	3.313	0.438	0.582	-1.02	0.296	0.293	0.205	316.62	55.44	-95.03	145.43	34.88	-82.75
2017-06-20	01:37:17.215	44.1996	11.5913	21.6	3.93	-0.269	-0.625	0.894	-0.537	0.266	-0.099	341	45.37	114.99	127.43	49.83	66.83
2017-07-01	08:10:35.618	46.5157	7.0913	4.6	4.014	0.695	0.004	-0.699	0.164	0.552	0.428	299.56	67.62	-76.42	87.16	26	-119.7
2017-07-06	16:58:34.730	46.001	14.9745	6.5	3.318	-1.012	0.104	0.908	0.086	0.08	0.237	100.6	48.87	110.88	250.49	45.27	67.8
2017-07-21	17:03:57.719	45.6932	10.6983	4.7	3.438	-0.537	-0.259	0.796	0.36	0.603	-0.11	69.48	64.04	102.09	223.4	28.46	66.72
2017-08-08	09:35:08.636	45.1961	14.6378	2.8	3.607	-0.638	0.657	-0.019	-0.54	-0.278	0.46	246.6	78.92	24.8	151.52	65.69	167.82
2017-08-08	20:42:39.622	45.2059	14.5946	3.2	3.747	-0.633	0.71	-0.077	-0.64	-0.252	0.269	247.29	85.21	19.03	155.64	71.04	174.94
2017-08-08	21:53:59.751	45.1833	14.5281	3.3	3.373	-0.443	0.614	-0.171	-0.627	0.219	-0.507	337.94	75.72	161.78	72.58	72.36	15
2017-08-09	11:37:08.430	45.157	14.5659	3.1	3.896	-0.54	0.563	-0.023	-0.652	-0.105	0.509	252.98	65.61	10.93	158.42	80.05	155.22
2017-08-09	20:39:59.932	45.1612	14.5646	1.6	3.486	-0.606	0.622	-0.016	-0.505	0.597	0.106	242.59	77.09	-27.82	339.32	62.94	-165.47
2017-08-23	07:30:20.654	46.1407	9.553	16.5	3.785	0.31	-0.255	-0.056	-0.02	-0.9	-0.329	219.51	12.84	-162.49	112.41	86.16	-77.74
2017-09-06	12:22:31.517	46.1933	12.001	11.3	3.602	-0.969	0.759	0.21	0.373	-0.066	-0.277	301.33	75.53	164.45	35.31	74.96	14.99
2017-09-06	12:30:32.541	46.2055	11.9821	5.5	3.252	-0.981	0.377	-0.537	0.048	-0.353	-0.42	137	84.38	-139.5	42.22	49.74	-7.37
2017-09-10	18:01:00.656	44.7605	9.7741	23.4	3.753	-0.534	0.578	-0.044	-0.761	0.184	0.275	251	71.39	-5.54	342.77	84.75	-161.31
2017-10-25	03:41:18.354	45.3106	6.3604	4.8	3.546	0.696	-0.094	-0.603	0.197	-0.049	0.728	317.61	62.22	-49.92	76.6	47.39	-140.7
2017-10-27	01:09:53.788	45.3839	6.3006	2.7	3.595	0.82	0.128	-0.947	0.258	0.255	0.276	298.13	55.55	-79.1	99.34	35.93	-105.41
2017-11-03	18:15:44.043	47.1342	11.421	10.7	3.591	-0.864	0.463	0.402	0.659	0.031	0.064	203.18	81.71	8.16	112	81.93	171.62
2017-11-19	12:37:49.891	44.6342	10.0718	18.9	4.511	-0.278	-0.331	0.609	-0.712	0.23	-0.402	103.93	52.1	38.67	347.75	60.46	135.08
2018-01-17	10:22:20.637	46.3068	13.5094	2.6	3.833	-0.828	-0.071	0.899	0.299	0.069	0.395	230.74	50.81	62.31	90.45	46.66	119.68
2018-01-17	19:07:20.487	47.1836	9.9213	3	3.921	-0.777	0.822	-0.045	0.385	-0.195	-0.416	300.79	80.41	158.87	34.48	69.18	10.26
2018-01-19	17:39:45.039	46.439	13.0269	10.4	3.697	0.055	-0.542	0.487	0.039	0.397	-0.758	164.73	18.69	52.35	23.9	75.31	101.67
2018-02-01	01:47:34.829	47.184	9.9906	1.6	3.823	-0.682	0.817	-0.135	0.035	-0.526	0.384	41.39	82.95	-40.5	137.37	49.87	-170.77
2018-02-25	08:16:31.985	46.4231	12.6369	10.8	3.67	-0.353	0.009	0.343	0.925	0.092	0.123	186.97	77.71	13.01	94.15	77.29	167.4
2018-02-25	15:53:07.071	46.3912	12.5994	9	3.523	-0.217	0.902	-0.685	0.372	0.15	0.418	340.71	58.83	-93.07	166.63	31.3	-84.93
2018-03-05	21:50:40.509	43.9125	12.0071	2.7	4.137	0.242	0.98	-0.09	0.092	0.211	-0.659	193.4	72.32	-73.43	328.99	24.05	-131.81
2018-04-12	02:24:00.506	47.1471	10.0229	4.4	3.318	-0.585	0.77	-0.185	0.083	0.662	-0.265	319.61	50.47	-163.73	219.09	77.52	-40.68
2018-05-01	05:17:01.524	43.2004	10.919	5	4.115	0.472	-0.008	-0.464	0.22	0.825	0.228	118.75	15.71	-77.71	286	74.66	-93.43
2018-05-03	18:46:08.872	44.0037	11.8157	2.6	3.784	0.716	0.209	-0.925	0.167	0.035	-0.515	269.39	43.95	-120.97	129.21	53.48	-63.62
2018-05-09	21:48:04.979	46.2677	13.0467	2.7	3.579	-0.597	0.275	0.322	0.089	0.297	-0.797	291.72	31.28	160.81	38.29	80.17	60.15
2018-05-19	16:41:27.044	44.8282	9.6946	20.2	4.108	-0.756	0.387	0.369	-0.53	0.283	-0.458	73.37	67.21	33.12	329.19	59.75	153.36
2018-06-14	12:23:21.341	45.5087	15.3836	3.7	3.459	-0.308	-0.019	0.327	-0.81	-0.347	-0.35	173.92	86.33	-157.48	82.4	67.52	-3.98
2018-07-01	07:32:20.672	44.2628	10.5464	7.8	3.893	0.833	-0.039	-0.794	0.405	-0.397	-0.126	294.01	32.57	-86.06	109.33	57.52	-92.51
2018-07-17	18:13:45.976	44.505	7.1421	5.5	3.462	-0.767	0.14	0.627	-0.072	0.628	0.316	111.13	68.41	105.05	254.97	26.11	56.72
2018-08-11	03:30:40.949	46.3365	13.0532	8.8	3.754	-0.917	0.302	0.615	0.122	0.418	-0.393	58.91	66.05	60.46	293.29	37.34	137.98
2018-08-21	00:33:51.282	44.7802	10.7321	9.5	3.913	-0.987	0.288	0.699	-0.02	-0.245	-0.408	297.72	60.33	124.73	63.25	44.44	45
2018-10-12	05:40:42.010	47.2421	11.3383	11.7	3.27	-0.354	0.913	-0.559	0.145	-0.586	0.022	26.32	55.71	-38.41	140.38	59.12	-138.97
2018-11-21	17:08:55.318	46.1262	5.0376	7.9	3.461	-0.991	0.526	0.466	-0.055	-0.285	0.422	236.66	69.11	41.95	128.89	51.35	152.84
2019-01-14	23:03:59.918	44.3853	12.2566	8.2	4.527	-0.281	0.167	0.662	-0.153	-0.645	-0.537	306.3	75.44	100.38	90.22	17.81	55.25
2019-02-05	08:31:02.811	45.9025	6.8548	4.6	3.286	0.882	-0.212	-0.67	-0.165	-0.422	-0.399	234.36	40.05	-137.34	109.16	64.15	-58.28
2019-02-05	08:31:02.811	45.9025	6.8548	4.6	3.286	0.882	-0.212	-0.67	-0.165	-0.422	-0.399	234.36	40.05	-137.34	109.16	64.15	-58.28
2019-03-07	19:07:54.644	46.3575	17.3963	8.4	3.694	-0.913	0.028	0.885	-0.268	-0.106	-0.329	301.94	53.3	112.16	87.66	42.05	63.15
2019-05-28	08:48:08.385	46.3401	6.7619	3.2	3.904	0.292	0.616	-0.908	0.472	-0.341	0.129	125.77	51.1	-115.32	342.76	45.29	-62.08
2019-06-14	13:57:25.407	46.3712	12.9574	2.1	3.869	-0.927	0.023	0.904	0.141	0.36	0.11	91.18	55.83	100.96	252.15	35.68	74.35
2019-06-15	04:12:49.761	46.3902	12.9254	1.2	3.496	-0.697	0.036	0.661	0.19	-0.09	0.703	222.35	65.3	57.5	99.09	39.98	139.44
2019-08-13	11:17:21.350	44.4945	9.8629	4.8	3.997	0.585	0.045	-0.629	0.493	-0.486	-0.389	127.55	65.01	-82.57	290.39	26	-105.51
2019-08-17	16:52:23.547	43.8876	11.7859	1.2	3.822	0.81	0.071	-0.881	0.264	0.039	-0.459	267.19	45.83	-122.59	129.72	52.82	-60.99
2019-09-22	12:58:42.087	46.4016	13.0314	12.1	3.636	-0.69	-0.24	0.931	0.489	0.213	-0.126	236.73	37.83	89.05	57.94	52.18	90.74
2019-10-01	22:24:23.215	45.7015	14.3176	15.4	3.412	-0.878	0.913	-0.035	-0.108	-0.371	0.217	47.58	85.68	-24.95	139.59	65.13	-175.24
2019-10-22	23:35:42.076	47.5622	12.2099	2.1	3.799	-0.601	0.231	0.37	-0.065	-0.053	0.847	244.18	53.65	33.62	132.67	63.51	138.53
2019-11-04	00:59:46.736	48.272	8.9713	5.3	3.647	-0.398	0.673	-0.275	0.573	-0.517	0.248	15.62	66.42	-28.09	117.67	64.44	-153.68
2019-11-11	10:52:45.713	44.5499	4.6168	1.9	4.77	-0.465	-0.465	0.93	0.383	0.407	-0.199	218.41	32.48	77.74	52.85	58.35	97.7
