# Supplementary material for: Regional centroid MT inversion of small to moderate earthquakes inthe Alps using the dense AlpArray seismic network: challenges andseismotectonic insights
Source: Copernicus journal article supplement (doi:10.5194/se-2021-13), 2021-02-16
Supplement: Supplementary file 1 [file se-2021-13-supplement.zip › Alps_2016-2019_CMT-statistics-solutions_Petersen.csv]

time					lat			lon			depth [km]			Mw			rmm			rmee			rmdd			rmne			rmnd			rmed
mean		std [s]	median		mean	std [km north]	median	mean	std [km east]	median	mean	std	median	mean	std	median	mean	std	median	mean	std	median	mean	std	median	mean	std	median	mean	std	median	mean	std	median
2016-01-31	22:43:59.403	1.2	2016-01-31	22:43:59.746	47.0572	5.4	47.055	10.0723	5.4	10.0724	8.6	1.7	8.7	3.531	0.037	3.53	-0.016	0.209	0.003	0.625	0.099	0.637	-0.609	0.243	-0.636	0.566	0.092	0.56	-0.016	0.259	0.038	0.384	0.14	0.399
2016-03-14	13:36:13.760	1.1	2016-03-14	13:36:14.024	44.4154	4.7	44.4069	7.2398	4.7	7.2283	7.9	2.6	7.9	3.764	0.023	3.766	0.224	0.104	0.212	-0.959	0.063	-0.963	0.735	0.098	0.748	0.147	0.117	0.164	-0.224	0.099	-0.236	0.347	0.131	0.371
2016-04-09	13:02:34.010	0.9	2016-04-09	13:02:34.003	45.9293	3.5	45.931	15.5758	3.5	15.5776	2.9	0.4	2.9	3.668	0.028	3.661	-0.992	0.097	-1.016	0.314	0.052	0.32	0.678	0.075	0.691	0.086	0.041	0.087	-0.303	0.228	-0.345	-0.029	0.256	0.032
2016-05-28	03:31:43.335	0.5	2016-05-28	03:31:43.334	44.9503	2.9	44.9494	11.2536	2.9	11.2431	6.1	1	6	3.304	0.016	3.303	-0.677	0.097	-0.69	0.539	0.095	0.544	0.138	0.124	0.148	-0.537	0.061	-0.535	0.225	0.092	0.212	-0.488	0.093	-0.493
2016-06-23	14:37:59.091	1.1	2016-06-23	14:37:58.541	44.1874	2.7	44.1919	9.9568	2.7	9.9595	7.9	1.7	7.9	4.004	0.015	4.005	0.736	0.061	0.741	-0.342	0.084	-0.346	-0.394	0.061	-0.397	0.685	0.046	0.689	0.249	0.049	0.254	-0.219	0.049	-0.217
2016-06-24	04:12:18.270	2.3	2016-06-24	04:12:18.941	46.2541	5.9	46.2558	7.3789	5.9	7.3962	17.3	9.8	15.3	3.227	0.071	3.206	-0.356	0.377	-0.24	0.293	0.343	0.201	0.063	0.209	0.052	0.683	0.342	0.814	0.287	0.213	0.313	0.063	0.161	0.071
2016-07-04	11:37:25.924	0.6	2016-07-04	11:37:26.005	44.9873	3.4	44.9912	11.3177	3.4	11.3225	5.4	0.6	5.5	3.632	0.019	3.631	-0.877	0.087	-0.895	0.156	0.073	0.162	0.721	0.104	0.735	-0.11	0.049	-0.114	-0.333	0.155	-0.376	-0.238	0.353	-0.194
2016-07-25	12:05:30.786	0.9	2016-07-25	12:05:31.087	47.3258	2	47.3248	11.1358	2	11.1507	9.4	1	9.4	3.297	0.016	3.299	-0.824	0.07	-0.838	0.062	0.11	0.043	0.762	0.121	0.789	0.115	0.106	0.09	-0.552	0.068	-0.538	0.125	0.051	0.135
2016-07-30	20:21:39.555	0.2	2016-07-30	20:21:39.588	44.9576	0.8	44.9581	7.2022	0.8	7.2017	8.6	1	8.7	3.819	0.02	3.819	-0.423	0.086	-0.436	0.902	0.04	0.906	-0.48	0.093	-0.475	-0.265	0.048	-0.278	-0.54	0.046	-0.539	-0.025	0.114	-0.036
2016-09-03	19:14:55.632	0.7	2016-09-03	19:14:55.584	43.9319	3.3	43.9312	7.5193	3.3	7.5272	8.2	1.4	8.3	3.481	0.026	3.481	-0.475	0.132	-0.48	0.948	0.094	0.959	0.054	0.258	0.055	0.38	0.092	0.389	-0.469	0.097	-0.482	-0.033	0.075	-0.025
2016-10-07	07:27:09.863	0.9	2016-10-07	07:27:09.890	46.5242	4	46.5359	9.5877	4	9.5948	9.2	0.5	9.1	3.584	0.009	3.584	0.886	0.027	0.884	-0.098	0.038	-0.097	-0.789	0.03	-0.79	0.326	0.032	0.326	-0.406	0.042	-0.412	0.123	0.031	0.124
2016-10-24	14:44:14.314	0.3	2016-10-24	14:44:14.331	46.3633	2.3	46.3701	7.5769	2.3	7.576	13.1	0.9	13	3.698	0.008	3.698	0.025	0.04	0.027	-0.347	0.04	-0.349	0.322	0.042	0.319	0.764	0.021	0.766	0.514	0.029	0.515	0.187	0.033	0.191
2016-10-25	16:53:04.079	0.6	2016-10-25	16:53:04.143	43.5913	2.3	43.5926	10.9927	2.3	10.9905	6.6	0.7	6.6	4.098	0.014	4.098	0.162	0.055	0.163	-0.259	0.059	-0.262	0.098	0.081	0.102	0.904	0.022	0.905	-0.342	0.057	-0.347	0.034	0.062	0.039
2016-10-30	10:49:47.238	1.1	2016-10-30	10:49:47.266	44.1495	5.8	44.1448	12.3154	5.8	12.3279	17.1	3.4	17.1	3.712	0.028	3.71	-0.515	0.199	-0.557	-0.116	0.206	-0.099	0.631	0.154	0.633	-0.585	0.152	-0.608	-0.296	0.201	-0.342	0.137	0.31	0.202
2016-11-09	15:35:11.235	2.1	2016-11-09	15:35:11.189	44.2251	8	44.2171	6.1006	8	6.1107	5.9	4.5	5.1	3.681	0.042	3.673	-0.693	0.311	-0.76	0.681	0.375	0.791	0.012	0.427	-0.011	0.182	0.145	0.18	-0.383	0.223	-0.421	-0.066	0.251	-0.007
2016-11-10	02:48:16.156	0.6	2016-11-10	02:48:15.985	44.2822	1.4	44.2799	6.1991	1.4	6.1999	4.7	0.6	4.7	3.78	0.028	3.779	-0.894	0.16	-0.922	0.172	0.187	0.144	0.722	0.328	0.802	0.12	0.075	0.119	0.303	0.196	0.344	0.257	0.158	0.289
2016-12-03	09:01:42.922	0.9	2016-12-03	09:01:43.017	46.9543	5.5	46.9486	5.5332	5.5	5.533	6.7	1.7	6.5	3.308	0.02	3.308	-0.145	0.129	-0.136	0.413	0.074	0.422	-0.268	0.153	-0.289	0.641	0.074	0.638	-0.616	0.159	-0.646	0.052	0.148	0.087
2016-12-09	07:21:54.397	0.7	2016-12-09	07:21:54.516	44.3223	3.1	44.3259	10.4438	3.1	10.4359	5.9	0.4	6	4.088	0.016	4.089	0.173	0.095	0.171	0.763	0.079	0.78	-0.937	0.036	-0.942	0.444	0.045	0.442	-0.035	0.112	-0.055	-0.166	0.076	-0.167
2017-02-09	08:14:03.744	2.3	2017-02-09	08:14:03.304	45.8707	4.7	45.8652	11.2896	4.7	11.2947	12.6	2.9	12.7	3.486	0.033	3.483	-0.173	0.215	-0.204	-0.309	0.206	-0.354	0.483	0.328	0.556	-0.414	0.212	-0.457	-0.554	0.352	-0.654	0.202	0.185	0.21
2017-03-06	20:12:09.062	0.4	2017-03-06	20:12:09.084	46.9244	1.2	46.9233	8.9204	1.2	8.9212	2.9	0.3	2.9	4.152	0.009	4.151	0.474	0.023	0.475	-0.219	0.025	-0.219	-0.255	0.021	-0.254	0.863	0.021	0.866	0.222	0.082	0.229	0.113	0.13	0.148
2017-03-31	02:15:15.123	5.5	2017-03-31	02:15:18.023	44.5087	13.9	44.5667	9.571	13.9	9.5639	11.4	6.2	10.2	3.481	0.042	3.482	0.272	0.287	0.34	0.284	0.368	0.304	-0.555	0.357	-0.661	0.233	0.443	0.422	0.357	0.267	0.4	-0.164	0.346	-0.223
2017-05-12	07:44:13.160	0.5	2017-05-12	07:44:13.170	47.2898	2.1	47.2914	11.3934	2.1	11.3866	19.8	2.2	19.7	3.328	0.02	3.336	-0.842	0.046	-0.837	0.584	0.072	0.574	0.258	0.07	0.256	0.538	0.062	0.55	-0.054	0.05	-0.059	-0.351	0.12	-0.366
2017-06-02	19:05:13.576	2.3	2017-06-02	19:05:13.602	46.2273	7.7	46.2307	7.2806	7.7	7.2849	8.2	6.3	5.1	3.293	0.034	3.293	0.604	0.173	0.62	-0.494	0.247	-0.48	-0.11	0.351	-0.167	0.395	0.106	0.389	-0.12	0.357	-0.178	-0.371	0.368	-0.5
2017-06-04	18:00:59.322	0.4	2017-06-04	18:00:59.328	45.6977	2.2	45.6989	10.7119	2.2	10.7092	5.4	0.6	5.3	3.49	0.012	3.489	-0.439	0.039	-0.436	-0.376	0.048	-0.369	0.816	0.056	0.81	0.411	0.026	0.409	0.552	0.057	0.551	0.068	0.117	0.087
2017-06-06	07:18:04.169	0.6	2017-06-06	07:18:04.206	46.8077	2.5	46.808	7.321	2.5	7.3242	3.7	0.5	3.8	3.304	0.03	3.311	0.406	0.06	0.417	0.597	0.047	0.593	-1.002	0.056	-1.018	0.31	0.045	0.306	0.25	0.131	0.26	0.207	0.112	0.207
2017-06-20	01:37:17.397	0.7	2017-06-20	01:37:17.302	44.1731	4.6	44.1839	11.57	4.6	11.5681	22.6	1.8	22.7	3.949	0.023	3.948	-0.378	0.101	-0.372	-0.449	0.151	-0.465	0.826	0.1	0.847	-0.546	0.062	-0.546	0.088	0.256	0.151	-0.039	0.297	-0.11
2017-07-01	08:10:35.613	0.4	2017-07-01	08:10:35.622	46.5108	0.9	46.5114	7.0885	0.9	7.0907	4.9	0.3	4.9	4.019	0.005	4.02	0.689	0.016	0.689	0.014	0.018	0.015	-0.703	0.02	-0.705	0.169	0.011	0.17	0.547	0.013	0.547	0.432	0.015	0.431
2017-07-06	16:58:33.908	0.8	2017-07-06	16:58:34.072	45.9826	4.7	45.9953	14.9874	4.7	14.9845	7.1	0.4	7	3.325	0.02	3.327	-0.995	0.025	-0.997	0.073	0.072	0.066	0.922	0.058	0.933	-0.002	0.079	0.02	0.109	0.078	0.115	0.194	0.106	0.185
2017-07-21	17:03:57.776	0.5	2017-07-21	17:03:57.719	45.7044	3.5	45.6993	10.688	3.5	10.6894	4.6	0.6	4.7	3.44	0.015	3.441	-0.516	0.039	-0.516	-0.267	0.043	-0.27	0.783	0.058	0.79	0.356	0.032	0.36	0.617	0.063	0.617	-0.017	0.096	-0.029
2017-08-08	09:35:08.618	0.8	2017-08-08	09:35:08.543	45.1951	2.3	45.1927	14.627	2.3	14.6251	3	0.6	3	3.622	0.023	3.62	-0.599	0.05	-0.601	0.636	0.069	0.643	-0.037	0.055	-0.035	-0.532	0.056	-0.536	-0.248	0.111	-0.244	0.487	0.125	0.493
2017-08-08	20:42:39.422	0.5	2017-08-08	20:42:39.481	45.199	1.6	45.1995	14.5848	1.6	14.5838	2.9	0.4	3	3.745	0.014	3.745	-0.626	0.029	-0.629	0.716	0.037	0.717	-0.09	0.027	-0.088	-0.657	0.029	-0.657	-0.163	0.073	-0.166	0.248	0.128	0.266
2017-08-08	21:54:00.045	0.6	2017-08-08	21:54:00.016	45.1697	3.5	45.1735	14.5412	3.5	14.5433	2.5	1	2.6	3.43	0.09	3.384	-0.385	0.122	-0.434	0.512	0.181	0.589	-0.128	0.077	-0.137	-0.527	0.16	-0.586	0.463	0.259	0.365	-0.381	0.173	-0.406
2017-08-09	11:37:08.598	0.6	2017-08-09	11:37:08.537	45.1691	2.3	45.1691	14.5622	2.3	14.5648	2.7	0.5	2.8	3.893	0.028	3.892	-0.528	0.064	-0.537	0.552	0.076	0.56	-0.024	0.055	-0.027	-0.644	0.061	-0.644	-0.084	0.146	-0.101	0.474	0.175	0.509
2017-08-09	20:39:59.850	0.8	2017-08-09	20:39:59.904	45.1685	2.7	45.1704	14.5464	2.7	14.5389	1.9	0.6	1.9	3.505	0.051	3.492	-0.555	0.115	-0.581	0.561	0.124	0.6	-0.006	0.043	-0.006	-0.491	0.095	-0.514	0.498	0.288	0.572	-0.169	0.253	-0.173
2017-08-23	07:30:20.487	0.3	2017-08-23	07:30:20.455	46.1558	1.6	46.1515	9.5325	1.6	9.5403	16.9	1.7	16.6	3.81	0.021	3.809	0.142	0.103	0.129	-0.274	0.11	-0.285	0.132	0.183	0.15	-0.039	0.07	-0.047	-0.866	0.108	-0.899	-0.342	0.172	-0.319
2017-09-06	12:22:31.282	0.9	2017-09-06	12:22:31.399	46.2296	2.9	46.2273	11.9807	2.9	11.9877	10.8	1.3	10.6	3.572	0.021	3.57	-0.93	0.069	-0.941	0.732	0.082	0.728	0.197	0.128	0.21	0.33	0.112	0.348	-0.06	0.091	-0.066	-0.361	0.054	-0.362
2017-09-06	12:30:32.550	1.4	2017-09-06	12:30:32.541	46.2049	3.8	46.2055	11.9628	3.8	11.9687	7.8	3.3	6.9	3.221	0.052	3.22	-0.959	0.248	-0.981	0.321	0.258	0.335	-0.53	0.335	-0.599	0.094	0.105	0.08	-0.2	0.193	-0.201	-0.32	0.168	-0.324
2017-09-10	18:01:01.039	0.6	2017-09-10	18:01:01.108	44.7854	3.2	44.7849	9.7617	3.2	9.7703	21.8	3.5	22	3.74	0.029	3.739	-0.551	0.115	-0.552	0.599	0.15	0.593	-0.048	0.094	-0.039	-0.707	0.097	-0.718	0.153	0.085	0.177	0.317	0.064	0.32
2017-10-25	03:41:18.494	1.3	2017-10-25	03:41:18.354	45.3317	6.8	45.3169	6.3935	6.8	6.4021	5.6	2.7	4.8	3.551	0.037	3.546	0.613	0.167	0.621	-0.071	0.191	-0.094	-0.542	0.246	-0.58	0.306	0.192	0.336	-0.062	0.199	-0.077	0.493	0.428	0.679
2017-10-27	01:09:53.903	0.4	2017-10-27	01:09:53.810	45.3791	1.3	45.3796	6.3019	1.3	6.3006	2.9	0.2	2.9	3.604	0.008	3.604	0.804	0.024	0.807	0.128	0.019	0.128	-0.932	0.027	-0.936	0.272	0.021	0.269	0.211	0.112	0.214	0.303	0.102	0.317
2017-11-03	18:15:42.937	1.4	2017-11-03	18:15:43.622	47.1126	2.5	47.1094	11.4266	2.5	11.4208	11.6	1.4	11.2	3.568	0.015	3.569	-0.847	0.05	-0.85	0.537	0.084	0.537	0.31	0.115	0.31	0.643	0.041	0.642	-0.053	0.075	-0.061	-0.033	0.113	-0.043
2017-11-19	12:37:49.605	0.4	2017-11-19	12:37:49.640	44.6304	1.5	44.6301	10.0802	1.5	10.0812	19.1	0.7	19.1	4.502	0.009	4.502	-0.234	0.065	-0.233	-0.377	0.08	-0.38	0.61	0.037	0.611	-0.694	0.024	-0.695	0.27	0.044	0.266	-0.384	0.065	-0.389
2018-01-17	10:22:20.747	0.7	2018-01-17	10:22:20.777	46.3183	4.5	46.3229	13.5199	4.5	13.5262	3.3	0.8	3.2	3.862	0.037	3.856	-0.797	0.068	-0.807	-0.057	0.089	-0.068	0.854	0.1	0.865	0.228	0.119	0.264	-0.072	0.261	-0.094	0.299	0.276	0.395
2018-01-17	19:07:21.192	0.6	2018-01-17	19:07:21.095	47.1786	1.7	47.1788	9.9681	1.7	9.9591	2.8	0.4	2.8	3.923	0.022	3.922	-0.788	0.071	-0.802	0.789	0.073	0.806	-0.001	0.041	-0.003	0.382	0.041	0.384	0.024	0.23	-0.018	-0.023	0.413	-0.162
2018-01-19	17:39:45.058	0.5	2018-01-19	17:39:45.039	46.4431	1.9	46.443	13.0394	1.9	13.0392	9.8	1	10	3.657	0.024	3.656	0.061	0.13	0.06	-0.492	0.133	-0.521	0.43	0.185	0.47	0.05	0.202	0.091	0.368	0.098	0.375	-0.734	0.152	-0.756
2018-02-01	01:47:34.412	0.8	2018-02-01	01:47:34.460	47.1888	2.4	47.1869	9.9815	2.4	9.9819	2	0.4	1.9	3.797	0.035	3.793	-0.755	0.097	-0.767	0.874	0.11	0.874	-0.119	0.044	-0.118	0.046	0.031	0.043	-0.303	0.359	-0.377	0.107	0.281	0.155
2018-02-25	08:16:31.789	0.9	2018-02-25	08:16:31.967	46.4087	3	46.4151	12.6345	3	12.631	10.6	0.7	10.7	3.673	0.015	3.674	-0.338	0.089	-0.343	0.023	0.068	0.012	0.314	0.093	0.331	0.922	0.025	0.925	-0.01	0.113	0.036	0.131	0.038	0.13
2018-02-25	15:53:07.174	0.7	2018-02-25	15:53:07.204	46.3927	1.9	46.3912	12.5914	1.9	12.5927	9.2	0.9	9	3.491	0.029	3.497	-0.119	0.156	-0.128	0.757	0.173	0.784	-0.638	0.214	-0.685	0.414	0.144	0.407	0.183	0.101	0.172	0.453	0.109	0.418
2018-03-05	21:50:40.583	0.8	2018-03-05	21:50:40.509	43.9051	3.7	43.9114	11.9684	3.7	11.9863	3.5	1.1	3.3	4.15	0.044	4.157	0.164	0.113	0.177	0.916	0.151	0.933	-0.226	0.323	-0.232	0.072	0.054	0.073	0.103	0.158	0.095	-0.641	0.132	-0.665
2018-04-12	02:23:58.973	1.4	2018-04-12	02:23:59.260	47.1525	6.1	47.1448	10.0549	6.1	10.0431	4.1	2	3.9	3.313	0.032	3.313	-0.633	0.179	-0.63	0.674	0.174	0.688	-0.04	0.191	-0.05	0.18	0.118	0.175	0.349	0.41	0.557	-0.23	0.365	-0.254
2018-05-01	05:17:00.761	2	2018-05-01	05:17:00.807	43.1822	6.6	43.1802	10.9386	6.6	10.919	9.9	7	8.2	4.091	0.053	4.082	0.588	0.166	0.595	-0.26	0.287	-0.268	-0.328	0.321	-0.379	0.337	0.128	0.315	0.608	0.284	0.688	0.152	0.173	0.183
2018-05-03	18:46:08.593	0.6	2018-05-03	18:46:08.588	44.0063	2.4	44.0056	11.812	2.4	11.8156	2.7	0.5	2.8	3.861	0.06	3.849	0.505	0.131	0.518	0.157	0.054	0.163	-0.662	0.174	-0.697	0.134	0.041	0.135	-0.013	0.422	0.02	-0.623	0.172	-0.643
2018-05-09	21:48:04.134	2	2018-05-09	21:48:04.528	46.2331	6.9	46.2378	13.052	6.9	13.0528	8.3	6	6.3	3.535	0.029	3.532	-0.729	0.275	-0.793	0.296	0.241	0.311	0.433	0.284	0.474	0.196	0.236	0.141	0.351	0.215	0.364	-0.368	0.301	-0.429
2018-05-19	16:41:27.522	0.6	2018-05-19	16:41:27.520	44.8058	3	44.8057	9.6915	3	9.6931	20.3	1.2	20.3	4.113	0.012	4.113	-0.719	0.039	-0.718	0.37	0.044	0.369	0.349	0.046	0.355	-0.521	0.041	-0.521	0.303	0.038	0.302	-0.491	0.043	-0.491
2018-06-14	12:23:21.396	2.3	2018-06-14	12:23:21.141	45.5581	8.4	45.5543	15.3411	8.4	15.3187	6.3	5.4	4.6	3.488	0.09	3.475	-0.189	0.249	-0.217	-0.237	0.269	-0.245	0.426	0.218	0.465	-0.709	0.173	-0.744	-0.251	0.218	-0.302	-0.253	0.253	-0.239
2018-07-01	07:32:20.425	0.6	2018-07-01	07:32:20.484	44.2402	4.8	44.253	10.5424	4.8	10.5447	8.9	1.4	8.3	3.882	0.023	3.885	0.851	0.073	0.836	-0.069	0.085	-0.061	-0.782	0.05	-0.788	0.421	0.066	0.419	-0.319	0.169	-0.395	-0.079	0.066	-0.095
2018-07-17	18:13:46.237	0.6	2018-07-17	18:13:46.235	44.493	1.9	44.4946	7.1104	1.9	7.117	6.8	1.2	6.4	3.465	0.02	3.464	-0.77	0.06	-0.767	0.13	0.079	0.119	0.64	0.068	0.649	-0.061	0.043	-0.061	0.615	0.048	0.622	0.301	0.081	0.308
2018-08-11	03:30:40.916	0.4	2018-08-11	03:30:40.959	46.3331	1.3	46.3332	13.0563	1.3	13.0558	9.1	0.5	9	3.749	0.006	3.749	-0.914	0.017	-0.912	0.308	0.03	0.302	0.606	0.036	0.612	0.135	0.023	0.135	0.416	0.027	0.417	-0.395	0.028	-0.397
2018-08-21	00:33:50.985	0.5	2018-08-21	00:33:50.991	44.7738	3.3	44.7785	10.6902	3.3	10.6731	9.9	0.7	9.9	3.912	0.012	3.913	-0.949	0.041	-0.953	0.226	0.067	0.226	0.723	0.051	0.722	-0.071	0.098	-0.051	-0.218	0.052	-0.221	-0.438	0.052	-0.431
2018-10-12	05:40:42.090	1.2	2018-10-12	05:40:42.115	47.2473	3.4	47.2421	11.3204	3.4	11.3278	12.5	2.4	12.5	3.274	0.02	3.271	-0.465	0.241	-0.478	0.847	0.217	0.913	-0.382	0.328	-0.44	0.106	0.177	0.149	-0.518	0.168	-0.541	-0.024	0.118	-0.028
2018-11-21	17:08:55.149	0.6	2018-11-21	17:08:55.149	46.1283	3	46.1262	5.0468	3	5.0387	8.9	1.6	8.7	3.467	0.017	3.465	-0.963	0.06	-0.973	0.578	0.072	0.574	0.385	0.086	0.384	-0.052	0.072	-0.064	-0.293	0.07	-0.291	0.428	0.072	0.424
2019-01-14	23:03:59.538	1.3	2019-01-14	23:03:59.553	44.3816	2.6	44.3802	12.3283	2.6	12.3303	9.6	1.8	9.5	4.512	0.035	4.509	-0.308	0.213	-0.337	0.101	0.118	0.113	0.652	0.281	0.683	-0.196	0.084	-0.193	-0.581	0.179	-0.619	-0.481	0.142	-0.501
2019-02-05	08:31:01.090	2.4	2019-02-05	08:31:01.755	45.845	7.3	45.845	6.974	7.3	6.9432	9.3	5.6	8.3	3.269	0.035	3.268	0.844	0.198	0.881	-0.339	0.263	-0.298	-0.505	0.329	-0.566	-0.218	0.111	-0.215	-0.16	0.319	-0.196	-0.192	0.356	-0.279
2019-02-05	08:31:01.090	2.4	2019-02-05	08:31:01.755	45.845	7.3	45.845	6.974	7.3	6.9432	9.3	5.6	8.3	3.269	0.035	3.268	0.844	0.198	0.881	-0.339	0.263	-0.298	-0.505	0.329	-0.566	-0.218	0.111	-0.215	-0.16	0.319	-0.196	-0.192	0.356	-0.279
2019-03-07	19:07:53.525	2.9	2019-03-07	19:07:53.232	46.3438	8.2	46.3521	17.1641	8.2	17.1656	13	9.5	7.5	3.726	0.059	3.719	-0.679	0.324	-0.742	0.187	0.495	0.047	0.492	0.469	0.713	-0.225	0.395	-0.325	-0.121	0.184	-0.142	-0.031	0.3	-0.091
2019-05-28	08:48:08.406	0.3	2019-05-28	08:48:08.385	46.3402	1.1	46.3401	6.7608	1.1	6.7619	2.9	0.2	2.9	3.903	0.006	3.904	0.291	0.018	0.292	0.621	0.016	0.622	-0.912	0.018	-0.91	0.467	0.013	0.468	-0.325	0.044	-0.327	0.136	0.064	0.134
2019-06-14	13:57:25.423	0.3	2019-06-14	13:57:25.437	46.3658	1.4	46.3657	12.9599	1.4	12.959	2	0.2	2	3.88	0.013	3.878	-0.901	0.04	-0.906	0.02	0.017	0.019	0.881	0.04	0.887	0.127	0.015	0.128	0.369	0.121	0.376	0.153	0.121	0.156
2019-06-15	04:12:49.187	1.1	2019-06-15	04:12:49.225	46.3921	3.6	46.3902	12.9374	3.6	12.9352	1.6	0.5	1.5	3.524	0.056	3.52	-0.701	0.12	-0.698	0.017	0.048	0.023	0.684	0.132	0.675	0.209	0.057	0.207	-0.23	0.355	-0.339	0.455	0.265	0.549
2019-08-13	11:17:21.225	0.6	2019-08-13	11:17:21.196	44.4872	5.8	44.4832	9.8368	5.8	9.8388	5.7	2.6	5.2	4.034	0.054	4.028	0.519	0.177	0.54	0.092	0.117	0.078	-0.611	0.159	-0.645	0.484	0.136	0.465	-0.458	0.113	-0.46	-0.387	0.12	-0.379
2019-08-17	16:52:23.836	2	2019-08-17	16:52:23.547	43.8881	6.1	43.8876	11.7826	6.1	11.7838	3.5	6	1.6	3.882	0.052	3.881	0.585	0.482	0.704	0.098	0.088	0.094	-0.683	0.436	-0.805	0.205	0.154	0.245	0.151	0.352	0.132	-0.284	0.287	-0.33
2019-09-22	12:58:42.399	1	2019-09-22	12:58:42.309	46.4013	3.5	46.4016	13.0176	3.5	13.0168	11.5	0.5	11.5	3.633	0.01	3.633	-0.668	0.055	-0.66	-0.248	0.056	-0.259	0.916	0.031	0.919	0.482	0.044	0.482	0.231	0.051	0.235	-0.176	0.044	-0.174
2019-10-01	22:24:21.666	1.3	2019-10-01	22:24:21.709	45.6459	4.9	45.6457	14.3121	4.9	14.3205	14.1	1.9	14.2	3.411	0.021	3.412	-0.862	0.089	-0.877	0.869	0.076	0.871	-0.007	0.139	-0.007	-0.128	0.136	-0.11	-0.386	0.059	-0.385	0.207	0.067	0.206
2019-10-22	23:35:42.356	0.3	2019-10-22	23:35:42.376	47.5594	1.5	47.5603	12.2198	1.5	12.2206	2.1	0.4	2	3.796	0.029	3.799	-0.604	0.074	-0.591	0.216	0.033	0.216	0.388	0.061	0.372	-0.066	0.021	-0.064	0.031	0.213	0.038	0.812	0.055	0.826
2019-11-04	00:59:46.857	1	2019-11-04	00:59:46.842	48.2698	5.1	48.2703	8.9719	5.1	8.9713	5	2.8	4.6	3.618	0.034	3.614	-0.447	0.097	-0.445	0.587	0.103	0.582	-0.14	0.15	-0.132	0.695	0.069	0.699	-0.173	0.246	-0.197	-0.118	0.324	-0.201
2019-11-11	10:52:45.677	0.3	2019-11-11	10:52:45.683	44.5519	1.8	44.5528	4.6092	1.8	4.6073	2	0.3	2	4.758	0.013	4.757	-0.482	0.026	-0.483	-0.477	0.029	-0.477	0.959	0.04	0.96	0.399	0.021	0.4	0.314	0.108	0.314	-0.152	0.124	-0.154
